# Supplementary material
Source: HighWire-hosted journal article supplement (http://jpet.aspetjournals.org/highwire/filestream/142642/field_highwire_adjunct_files/0/249102SupplFigs.pdf)
Supplement: 249102SupplFigs.pdf [file 249102SupplFigs.pdf]

**Journal of Pharmacology and Experimental Therapeutics**

**Antagonizing SET augments the effects of radiotherapy in  
hepatocellular carcinoma through reactivating PP2A-mediated  
Akt downregulation <sup>∅</sup>**

Chao-Yuan Huang, Man-Hsin Hung, Chi-Ting Shih, Feng-Shu Hsieh,

Chiung-Wen Kuo, Ming-Hsien Tsai, Shih-Shin Chang, Yung-Jen Hsiao, Li-Ju

Chen, Tzu-I Chao, Kuen-Feng Chen

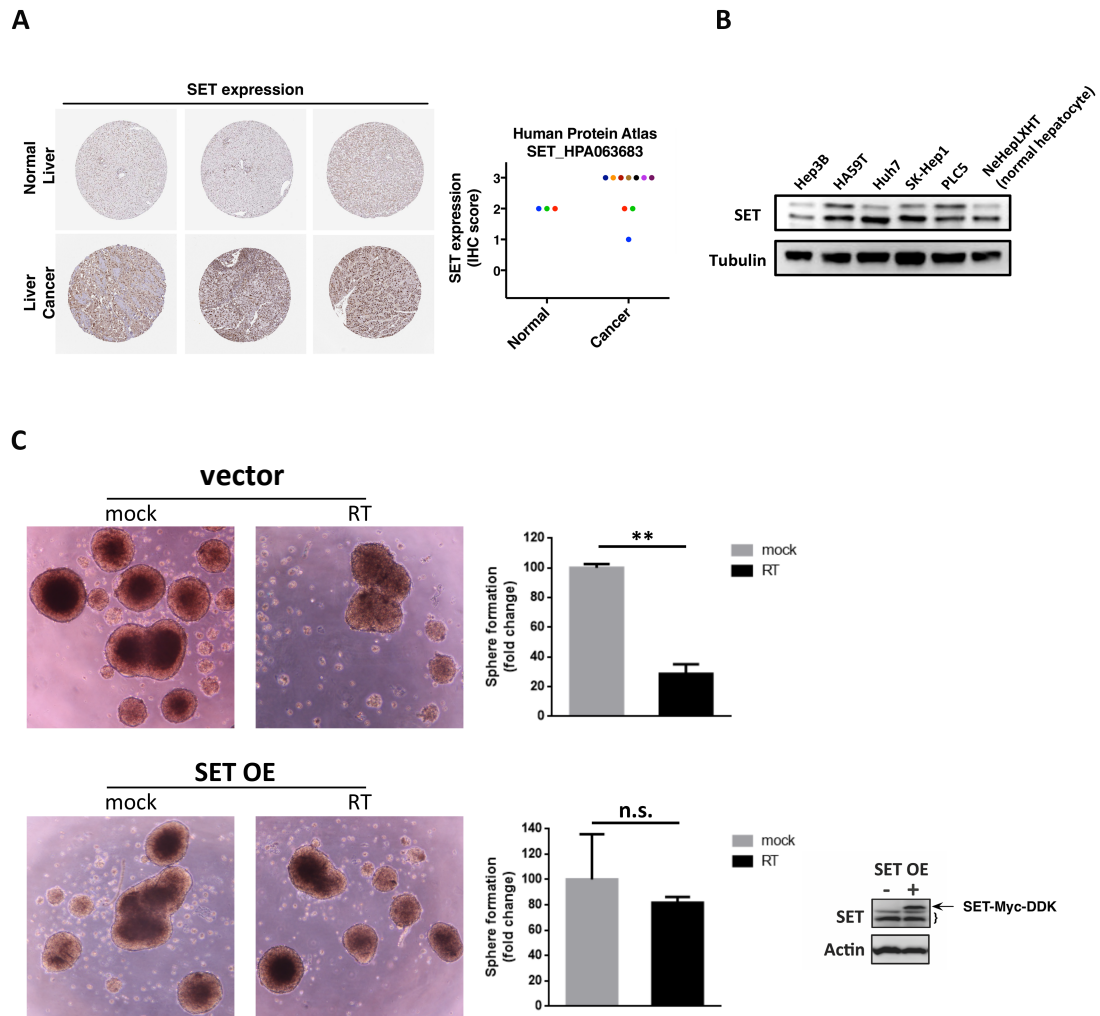

**Supplement Figure 1.** (A) Representative images of IHC staining of SET protein in normal liver tissues (N=3) and HCC tumors (N=12). Image credit: Human Protein Atlas (<http://v18.proteinatlas.org/>)\*. IHC score: 0, no detected; 1, Low; 2, Medium; 3, High. (B) The expressions of SET were determined in a panel of HCC cell lines and normal liver cell by western blot. (C) Overexpression of SET reversed RT-mediated anti-tumor effects. The effects of RT on Hep3B cells with/without SET expression were assessed by sphere formation. N=3. Representative images of tumor sphere were presented on left panel and the quantified results were presented over the right panel. Curly bracket highlighted the bands of endogenous SET, and arrow indicated the ectopic expressed SET. Bar: mean; error bar, SD. \*\*,  $p < 0.01$ ; n.s., not significant.

\*Reference: Uhlen M et al, 2017. A pathology atlas of the human cancer transcriptome. Science.

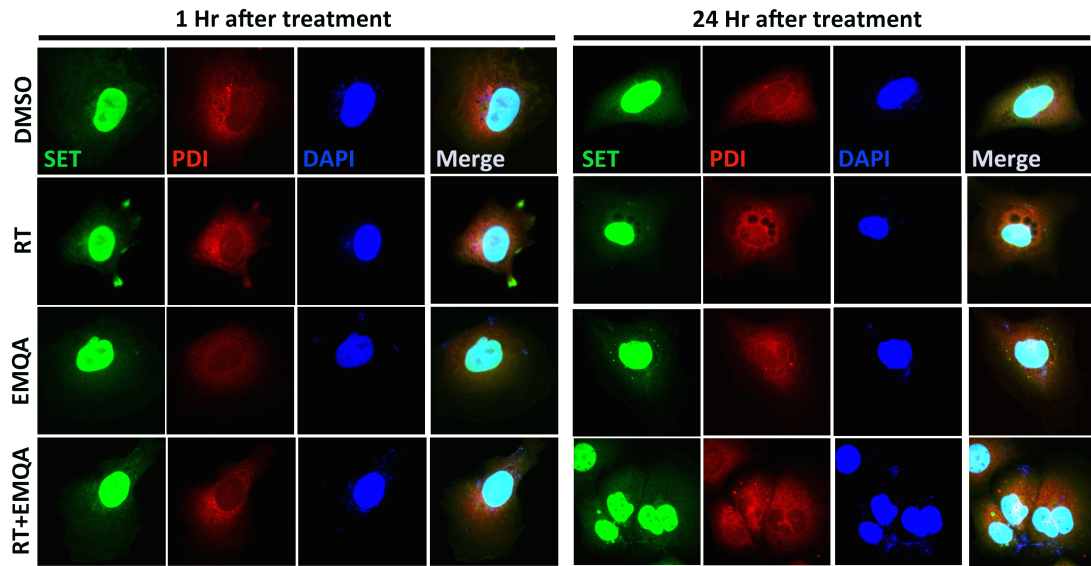

**Supplement Figure 2.** Radiotherapy and/or EMQA treatment did not affect the expressions of SET in different cellular components. Representative images of SET (green), PDI (red, represent endoplasmic reticulum) and DAPI (blue, represented nucleus) taken one and 24 hours after indicated treatments were shown here.
